# Supplementary material for: Clinical and Analytical Validation of Two Methods for Ki-67 Scoring in Formalin Fixed and Paraffin Embedded Tissue Sections of Early Breast Cancer
Source: MDPI journal article supplement (doi:10.3390/cancers16071405), 2024-04-03
Supplement: s1 [file s1]

**Table S1.** Summary statistics of log2-transformed measurements for each of three methods (M1, M2 and M3) of Ki-67 assessment by three different pathologists

| Method | Pathologist | Min  | Q1   | Median | Mean | Q3   | Max  | SD   | N. of missing observations |
|--------|-------------|------|------|--------|------|------|------|------|----------------------------|
| M1     | 1           | 0.14 | 3.34 | 4.18   | 4.03 | 4.91 | 6.46 | 1.26 | 0                          |
| M1     | 2           | 0.14 | 3.34 | 4.18   | 4.06 | 4.92 | 6.57 | 1.29 | 0                          |
| M1     | 3           | 0.14 | 3.02 | 3.92   | 3.76 | 4.65 | 6.41 | 1.34 | 0                          |
| M2     | 1           | 0.14 | 3.60 | 4.32   | 4.30 | 5.05 | 6.57 | 1.13 | 0                          |
| M2     | 2           | 0.14 | 3.60 | 4.33   | 4.36 | 5.17 | 6.60 | 1.14 | 0                          |
| M2     | 3           | 0.14 | 3.19 | 4.01   | 4.00 | 4.92 | 6.48 | 1.23 | 0                          |
| M3     | 1           | 1.63 | 3.92 | 4.65   | 4.49 | 5.25 | 6.41 | 1.11 | 336                        |
| M3     | 2           | 1.63 | 3.84 | 4.70   | 4.57 | 5.50 | 6.43 | 1.15 | 339                        |
| M3     | 3           | 1.07 | 3.87 | 4.47   | 4.37 | 5.13 | 6.34 | 1.09 | 338                        |

**Table S2.** Baseline characteristics of patient and tumor in all patients (left part of table) and according S-phase fraction (SPF) and method 1 of Ki-67 expression in tumor (right part of table).

NST = invasive carcinoma of no special type; LVI = lymphovascular invasion; IQR = interquartile range

| Characteristic<br>n (%)                     | All<br>patients<br>n=411 (100) | Low SPF<br>(<6.7%)<br>n=193 (47) | High SPF<br>(≥6.7%)<br>n=218 (53) | p-value | Low Ki-67<br>1-5%<br>n=57 (13.9) | Ki-67<br>6-29%<br>n=258 (62.8) | High Ki-67<br>≥30%<br>n=96 (23.3) | p-value |
|---------------------------------------------|--------------------------------|----------------------------------|-----------------------------------|---------|----------------------------------|--------------------------------|-----------------------------------|---------|
| <b>Age</b> median<br>(IQR)                  | 58.9<br>(46.7-67.2)            | 60.5<br>(47.7-68.6)              | 58.3<br>(46.7-65.4)               |         | 60.1<br>(50.2-68.1)              | 60.5<br>(50.3-60.0)            | 54.8<br>(44.4-65.4)               |         |
| <b>Age</b> n (%)                            |                                |                                  |                                   | 0.704   |                                  |                                |                                   | 0.074   |
| <50 years                                   | 123 (29.9)                     | 56 (45.5)                        | 67 (54.5)                         |         | 13 (10.6)                        | 71 (59.2)                      | 37 (30.8)                         |         |
| ≥50 years                                   | 288 (70.1)                     | 137 (47.6)                       | 151 (52.4)                        |         | 44 (15.3)                        | 185 (64.2)                     | 59 (21.1)                         |         |
| <b>Histology</b> n (%)                      |                                |                                  |                                   | 0.077   |                                  |                                |                                   | <0.0001 |
| NST                                         | 350 (85.2)                     | 158 (45.1)                       | 192 (54.9)                        |         | 38 (10.9)                        | 226 (64.6)                     | 86 (24.6)                         |         |
| ILC and other                               | 61 (14.8)                      | 35 (57.4)                        | 26 (42.6)                         |         | 19 (31.1)                        | 32 (52.5)                      | 10 (16.4)                         |         |
| <b>Grade</b> n (%)                          |                                |                                  |                                   | <0.0001 |                                  |                                |                                   | <0.0001 |
| Grade 1                                     | 42 (10.2)                      | 33 (78.6)                        | 9 (21.4)                          |         | 21 (50.0)                        | 21 (50.0)                      | 0 (0)                             |         |
| Grade 2                                     | 170 (41.4)                     | 104 (61.2)                       | 66 (38.8)                         |         | 32 (18.8)                        | 132 (77.6)                     | 6 (3.6)                           |         |
| Grade 3                                     | 199 (48.4)                     | 56 (28.1)                        | 143 (71.9)                        |         | 4 (2.0)                          | 105 (52.8)                     | 90 (45.2)                         |         |
| <b>LVI</b> n (%)                            |                                |                                  |                                   | 0.011   |                                  |                                |                                   | 0.495   |
| Absent                                      | 218 (68.3)                     | 111 (50.9)                       | 107 (49.1)                        |         | 37 (17.0)                        | 138 (63.3)                     | 43 (19.7)                         |         |
| Present                                     | 191 (31.7)                     | 36 (36.6)                        | 65 (64.4)                         |         | 12 (11.9)                        | 67 (66.3)                      | 22 (21.8)                         |         |
| <b>Tumor stage</b><br>n (%)                 |                                |                                  |                                   | 0.038   |                                  |                                |                                   | 0.014   |
| pT1 (≤20mm)                                 | 154 (37.5)                     | 85 (55.2)                        | 69 (44.8)                         |         | 28 (18.2)                        | 100 (64.9)                     | 26 (16.9)                         |         |
| pT2 (>20≤50)                                | 221 (53.8)                     | 93 (22.1)                        | 128 (57.9)                        |         | 22 (10.0)                        | 141 (63.8)                     | 58 (26.2)                         |         |
| pT3 (>50 mm)                                | 35 (8.5)                       | 15 (42.9)                        | 20 (57.1)                         |         | 7 (20.0)                         | 16 (45.7)                      | 12 (34.3)                         |         |
| Missing                                     | 1 (0.2)                        |                                  |                                   |         |                                  |                                |                                   |         |
| <b>Lymph nodes</b><br>n (%)                 |                                |                                  |                                   | 0.260   |                                  |                                |                                   | 0.355   |
| pN0 (negative)                              | 227 (55.2)                     | 116 (51.1)                       | 111 (48.9)                        |         | 25 (11.0)                        | 146 (64.3)                     | 56 (24.7)                         |         |
| pN1 (1-3 positive)                          | 100 (24.3)                     | 44 (44.0)                        | 56 (56.0)                         |         | 19 (19.0)                        | 60 (60.0)                      | 21 (21.0)                         |         |
| pN2 (4-9 positive)                          | 49 (11.9)                      | 20 (40.8)                        | 29 (59.2)                         |         | 8 (16.3)                         | 33 (67.3)                      | 8 (16.3)                          |         |
| pN3 (≥10 positive)                          | 35 (8.5)                       | 13 (37.1)                        | 22 (62.9)                         |         | 5 (14.3)                         | 19 (54.3)                      | 11 (31.4)                         |         |
| <b>Estrogen receptor<br/>(ER)</b> n (%) (9) |                                |                                  |                                   | <0.0001 |                                  |                                |                                   | <0.0001 |
| ER negative                                 | 126 (31.3)                     | 38 (30.2)                        | 88 (69.8)                         |         | 7 (5.6)                          | 61 (48.4)                      | 58 (46.0)                         |         |
| ER positive                                 | 276 (68.7)                     | 151 (54.7)                       | 125 (45.3)                        |         | 49 (17.8)                        | 192 (69.6)                     | 35 (12.7)                         |         |

**Table S3.** Main treatment modalities in patients.

CMF: chemotherapy consisting of cyclophosphamide, 5-fluorouracil and methotrexate; RT: radiation therapy; ET: endocrine therapy; Cht: chemotherapy

| Type of treatment      | All patients<br>(n=441) | Low SPF<br>(<6.7%)<br>(n=193) | High SPF<br>(≥6.7%)<br>(n=218) | p-value | Low Ki-67<br>1-5%<br>(n=57) | Intermediate Ki-67<br>6-29%<br>(n=258) | High Ki-67<br>≥30%<br>(n=96) | p-value |
|------------------------|-------------------------|-------------------------------|--------------------------------|---------|-----------------------------|----------------------------------------|------------------------------|---------|
| <b>Type of surgery</b> |                         |                               |                                | 0.780   |                             |                                        |                              | 0.513   |
| Mastectomy             | 274 (66.7)              | 130 (47.4)                    | 144 (52.6)                     |         | 35 (12.8)                   | 177 (64.6)                             | 62 (22.6)                    |         |
| BCS                    | 137 (33.3)              | 63 (46)                       | 74 (54)                        |         | 22 (16.1)                   | 81 (59.1)                              | 34 (24.8)                    |         |
| <b>Adjuvant RT</b>     |                         |                               |                                | 0.010   |                             |                                        |                              | 0.078   |
| No                     | 263 (64.0)              | 136 (51.7)                    | 127 (48.3)                     |         | 43 (16.3)                   | 165 (62.8)                             | 55 (20.9)                    |         |
| Yes                    | 148 (36.0)              | 57 (38.5)                     | 91 (61.5)                      |         | 14 (9.5)                    | 93 (62.8)                              | 41 (27.7)                    |         |
| <b>Adjuvant ET</b>     |                         |                               |                                | 0.029   |                             |                                        |                              | 0.011   |
| No                     | 181 (44.0)              | 74 (40.9)                     | 107 (59.1)                     |         | 19 (10.5)                   | 108 (59.7)                             | 54 (29.8)                    |         |
| Yes                    | 230 (56.0)              | 119 (51.7)                    | 111 (48.3)                     |         | 38 (16.5)                   | 150 (65.2)                             | 42 (18.3)                    |         |
| <b>Adjuvant Cht</b>    |                         |                               |                                | 0.027   |                             |                                        |                              | 0.040   |
| No                     | 204 (49.6)              | 107 (52.5)                    | 97 (47.5)                      |         | 32 (15.7)                   | 135 (66.2)                             | 37 (18.1)                    |         |
| Yes                    | 207 (50.4)              | 86 (41.5)                     | 121 (58.5)                     |         | 25 (12.1)                   | 123 (59.4)                             | 59 (28.5)                    |         |
| <b>Events</b>          |                         |                               |                                |         |                             |                                        |                              |         |
| Relapse                | 221 (53.1)              | 99 (44.8)                     | 122 (55.2)                     | 0.213   | 25 (11.3)                   | 143 (64.7)                             | 53 (24.0)                    | 0.270   |
| Death                  | 316 (76.9)              | 151 (47.8)                    | 165 (52.2)                     | 0.540   | 44 (13.9)                   | 203 (64.2)                             | 69 (21.8)                    | 0.401   |

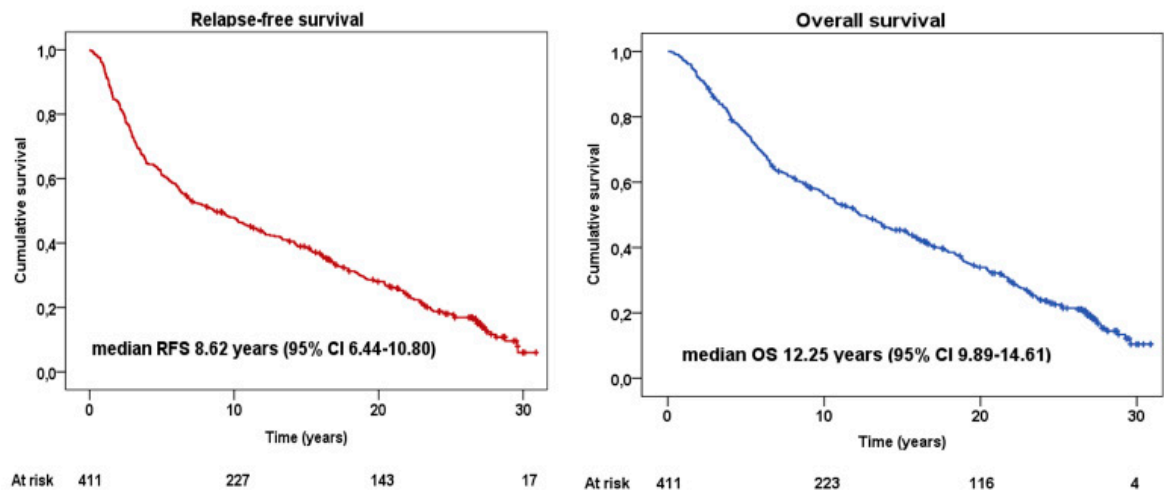

**Figure S1.** Survival curves for relapse-free survival and overall survival with corresponding median survival.
